# Supplementary material for: One-pot synthesis of tyrosine-stabilized fluorescent gold nanoclusters and their application as turn-on sensors for Al3+ions and turn-off sensors for Fe3+ions
Source: Royal Society of Chemistry journal article supplement (doi:10.1039/c4ay01137f), 2014-06-09
Supplement: c4ay01137f1.pdf [file c4ay01137f1.pdf]

## Supporting information

### **One-pot synthesis of tyrosine stabilized fluorescent gold nanoclusters and its application as turn-on sensor for Al<sup>3+</sup> ions and turn-off sensor for Fe<sup>3+</sup> ions**

**Xiaoyu Mu <sup>a,b</sup>, Li Qi <sup>\*a</sup>, Juan Qiao <sup>a</sup>, Huimin Ma <sup>a</sup>**

<sup>a</sup> Beijing National Laboratory for Molecular Sciences; Key Laboratory of Analytical Chemistry for Living Biosystems, Institute of Chemistry, Chinese Academy of Sciences, 100190 Beijing, China

<sup>b</sup> Graduate School, University of Chinese Academy of Sciences, 100049 Beijing, China

\* Correspondence: Li Qi

E-mail address: [qili@iccas.ac.cn](mailto:qili@iccas.ac.cn)

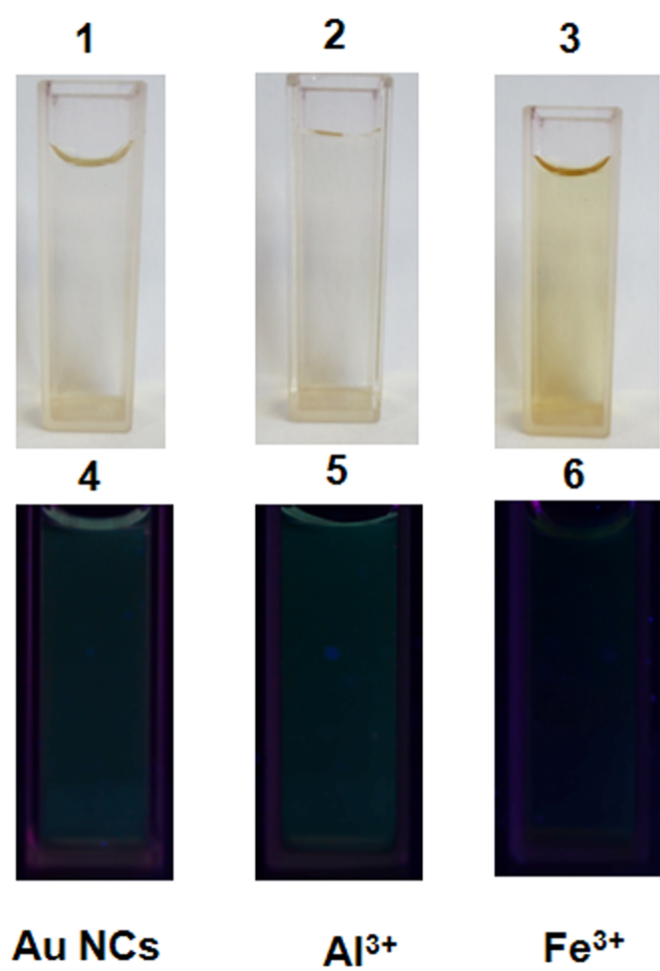

**Fig. S1.** Photographs under room light (1, 2, 3) and 365 nm UV light irradiation (4, 5, 6) of Au NCs before (1, 4) and after addition of Al<sup>3+</sup> (2, 5) and Fe<sup>3+</sup> (3, 6).

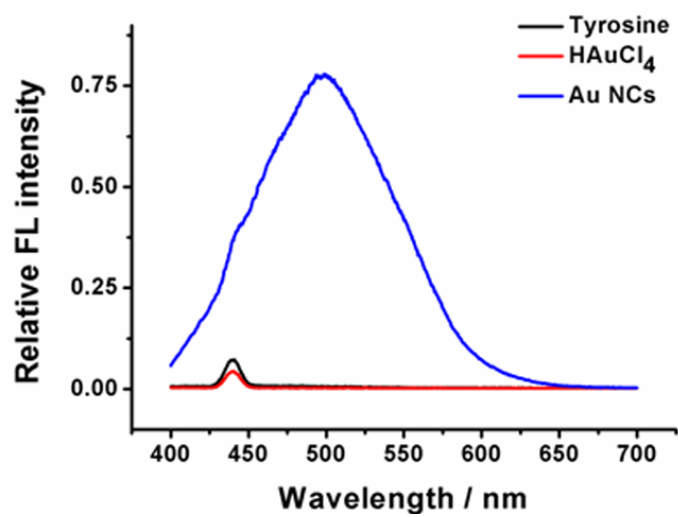

**Fig. S2.** The fluorescence spectra of the Au NCs, tyrosine solution and HAuCl<sub>4</sub> solution.

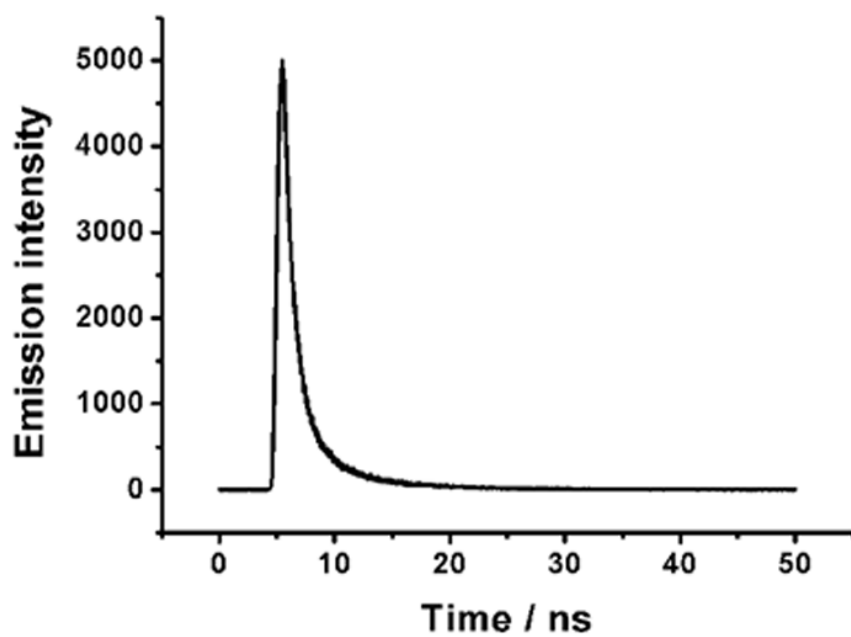

**Fig. S3.** Fluorescence lifetimes of the synthesized Au NCs in aqueous solution, data were collected at 498 nm with excitation at 365 nm.

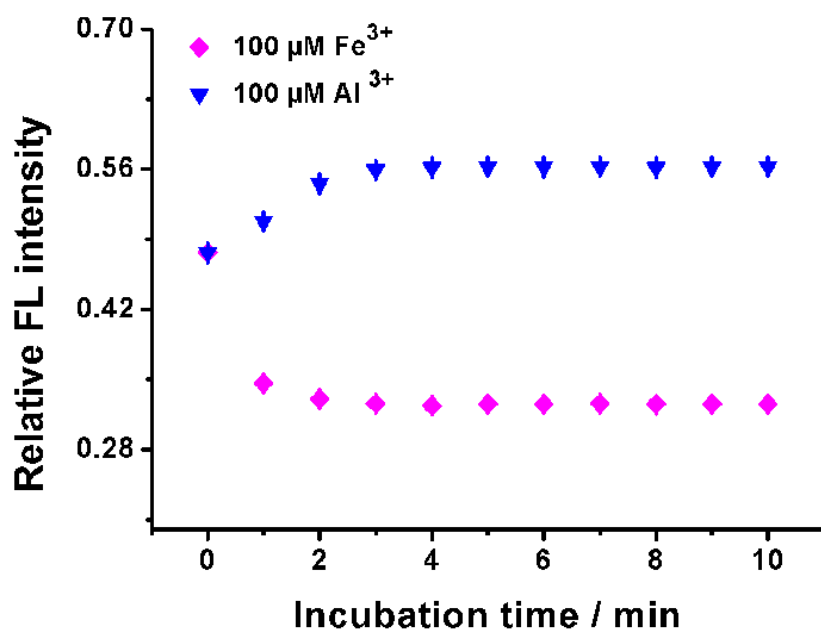

**Fig. S4.** Optimization of the incubation time for the fluorescence variation of the Au NCs in the presence of 100.0 μM Fe<sup>3+</sup> ions (pink square) and Al<sup>3+</sup> ions (blue triangle).

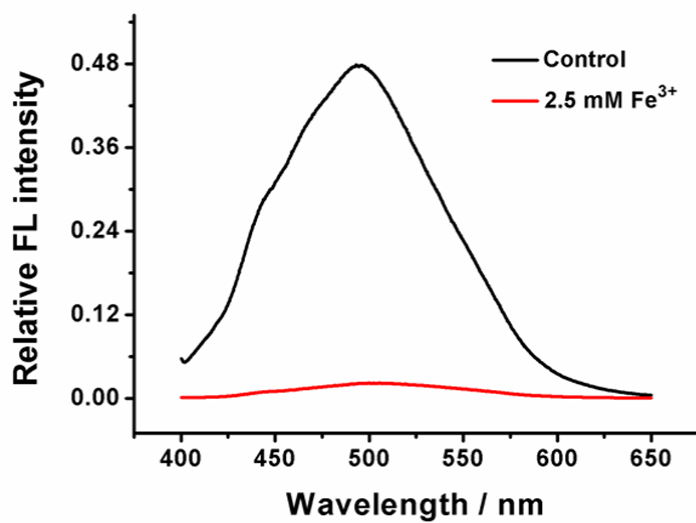

**Fig. S5.** The fluorescence response of the Au NCs upon addition of 2.5 mM Fe<sup>3+</sup> ions.

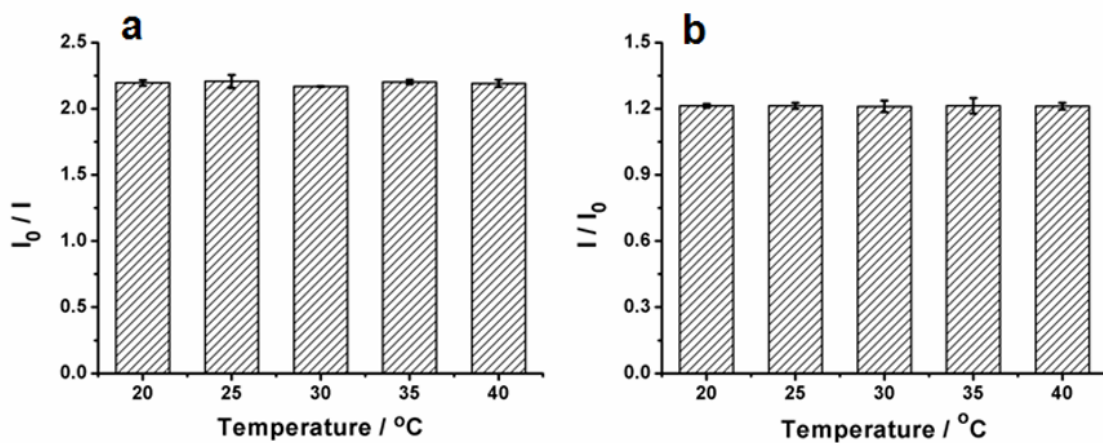

**Fig. S6.** The effect of temperature on the fluorescence response of Au NCs when exposed to  $Fe^{3+}$  (a) and  $Al^{3+}$  (b).

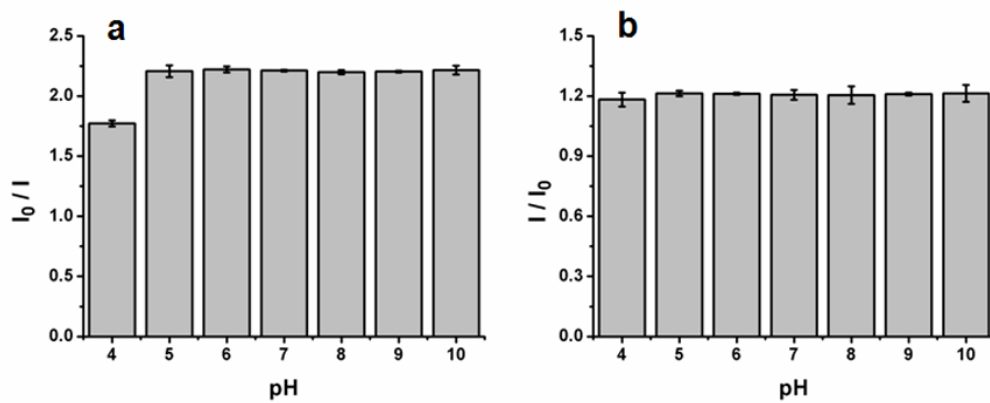

**Fig. S7.** The effect of pH on the fluorescence response of Au NCs when exposed to  $\text{Fe}^{3+}$  (a) and  $\text{Al}^{3+}$  (b).



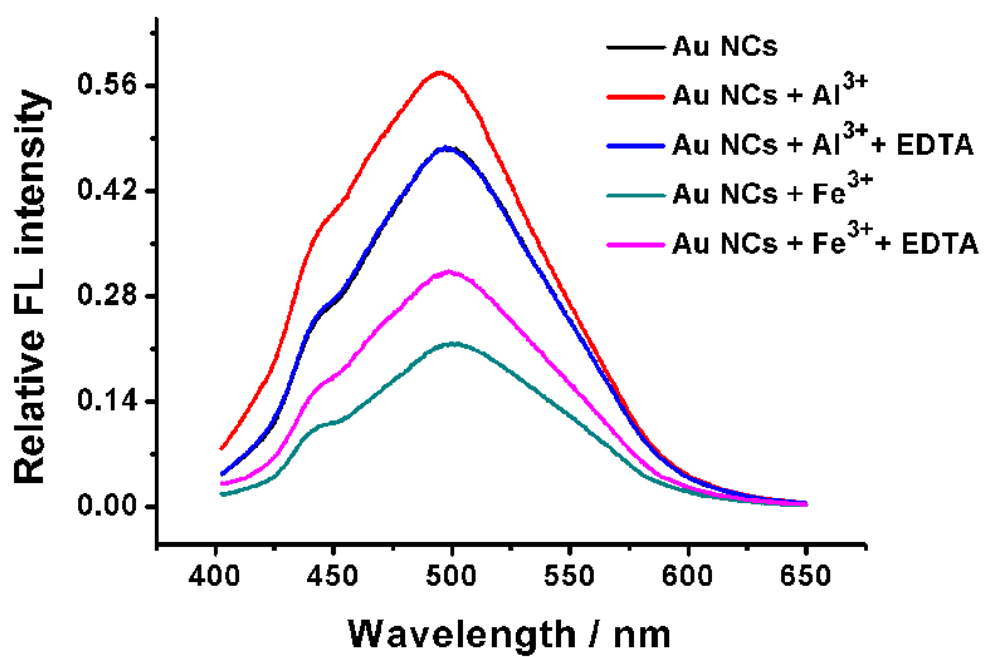

**Fig. S8.** Fluorescence spectra of the Au NCs solution, in the presence of 500.0  $\mu\text{M}$   $\text{Al}^{3+}$  or 500.0  $\mu\text{M}$   $\text{Fe}^{3+}$ , and in the presence of 500.0  $\mu\text{M}$  EDTA and 500.0  $\mu\text{M}$   $\text{Al}^{3+}$  or  $\text{Fe}^{3+}$ .
